# Supplementary material for: Determination of Particulate Matter in Dental Clinics: The Effectiveness of Different Air Purifiers and the Central Ventilation System
Source: Hindawi journal article supplement (doi:10.1155/2023/7258634), 2023-03-11
Supplement: f1 [file 7258634.f1.docx]

**Supplementary Material**

**Determination of Particulate Matter in Dental Clinics: The effectiveness of different air purifiers and the central ventilation system**

**M. Kermenidou1,2, E. Koulaouzidou3, V. Chasoglou3, O. Anesti2, K. Tolidis4, S. Karakitsios1,2, D. Sarigiannis1,2,5***

1Aristotle University of Thessaloniki, Department of Chemical Engineering, Environmental Engineering Laboratory, University Campus, Thessaloniki 54124, Greece

2HERACLES Research Center on the Exposome and Health, Center for Interdisciplinary Research and Innovation, Balkan Center, Bldg. B, 10th km Thessaloniki-Thermi Road, 57001, Greece

3Division of Dental Tissues’ Pathology and Therapeutics (Basic Dental Sciences, Endodontology and Operative Dentistry), School of Dentistry, Aristotle University of Thessaloniki, Thessaloniki, 54124, Greece

4Department of Operative Dentistry, Faculty of Dentistry, School of Health Sciences, Aristotle University of Thessaloniki, Thessaloniki, Greece

5School for Advanced Study (IUSS), Science, Technology and Society Department, Environmental Health Engineering, Piazza della Vittoria 15, Pavia 27100, Italy

****CORRESPONDING AUTHOR****:*

*Prof. Dimosthenis Sarigiannis*

*Director,*

*Environmental Engineering Laboratory*

*Department of Chemical Engineering*

*Aristotle University of Thessaloniki*

*University Campus, Bldg. D, Rm 201*

*54124 Thessaloniki, Greece*

*tel. +30-2310-994562*

*e-mail: sarigiannis@auth.gr*

***Table S1. Statistical results of a Tukey comparison of PM10 means under different conditions (with*** ***and without the simultaneous use of air purifier systems, with open and closed windows during dental procedures. (RWV = Rohnson + Winix + VacStation.)***

| **A comparison of means of PM10 for each procedure** | | **Turkey Significance (Significance level was set at P <0.05 for all analyses)** |
| --- | --- | --- |
| Grinding with RWV* & open windows | to Grinding with RWV & closed windows | 0.001 |
| to Grinding without RWV & with closed windows | 0 |
| to Background measurement & without grinding & closed windows | 0.007 |
| to Rohnson & Winix & VacStation & open windows & without grinding | 0.002 |
| to Rohnson & without grinding & with closed windows | 0 |
| to without grinding with Rohnson & Winix & open windows | 0 |
| to VacStation & without grinding & closed windows | 0 |
| to Winix & without grinding & closed windows | 0 |
| Grinding with RWV & closed windows | to Grinding with RWV & open windows | 0.001 |
| to Grinding without RWV & with closed windows | 0 |
| to Background measurement & without grinding & closed windows | 0 |
| to Rohnson & Winix & VacStation & open windows | 0 |
| to Rohnson & without grinding & closed windows | 0 |
| to Rohnson & Winix & open windows & without grinding | 0 |
| to VacStation& without grinding & closed windows | 0 |
| to Winix & without grinding & closed windows | 0 |
| Grinding without RWV & with closed windows | to Grinding with RWV & open windows | 0 |
| to Grinding with RWV & closed windows | 0 |
| to Background measurement & without grinding & closed windows | 0 |
| to Rohnson & Winix & VacStation & open windows & without grinding | 0 |
| to Rohnson & without grinding & closed windows | 0 |
| to Rohnson & Winix & open windows & without grinding | 0 |
| to VacStation & without grinding & closed windows | 0 |
| to Winix & without grinding & closed windows | 0 |
| Background measurement without grinding & closed windows | to Grinding with RWV & open windows | 0.007 |
| to Grinding with RWV & closed windows | 0 |
| to Grinding without RWV & with closed windows | 0 |
| to Rohnson & Winix & VacStation & open windows | 1 |
| to Rohnson & without grinding & closed windows | 0.985 |
| to Rohnson & Winix & open windows | 0.999 |
| to VacStation & without grinding & closed windows | 0.962 |
| to Winix & without grinding & closed windows | 0.941 |
| Rohnson & Winix & VacStation & open windows & without grinding | to Grinding with RWV & open windows | 0.002 |
| to Grinding with RWV & closed windows | 0 |
| to Grinding without RWV & with closed windows | 0 |
| to Background measurement & without grinding & closed windows | 1 |
| to Rohnson & without grinding & closed windows | 0.999 |
| to Rohnson & Winix & open windows & without grinding | 1 |
| to VacStation & without grinding & closed windows | 0.994 |
| to Winix & without grinding & closed windows | 0.988 |
| Rohnson & without grinding & closed windows | to Grinding with RWV & open windows | 0 |
| to Grinding with RWV & closed windows | 0 |
| to Grinding without RWV & with closed windows | 0 |
| to Background measurement & without grinding & closed windows | 0.985 |
| to Rohnson & Winix & VacStation & open windows | 0.999 |
| to Rohnson & Winix & open windows & without grinding | 1 |
| to VacStation & without grinding & closed windows | 1 |
| to Winix & without grinding & closed windows | 1 |
| Rohnson & Winix & open windows & without grinding | to Grinding with RWV & open windows | 0 |
| to Grinding with RWV & closed windows | 0 |
| to Grinding without RWV & with closed windows | 0 |
| to Background measurement & without grinding & closed windows | 0.999 |
| to Rohnson & Winix & VacStation & open windows & without grinding | 1 |
| to Rohnson & without grinding & closed windows | 1 |
| to VacStation & without grinding & closed windows | 1 |
| to Winix & without grinding & closed windows | 0.999 |
| VacStation & without grinding & closed windows | to Grinding with RWV & open windows | 0 |
| to Grinding with RWV & closed windows | 0 |
| to Grinding without RWV & with closed windows | 0 |
| to Background measurement & without grinding & closed windows | 0.962 |
| to Rohnson & Winix & VacStation & open windows & without grinding | 0.994 |
| to Rohnson & without grinding & closed windows | 1 |
| to Rohnson & Winix & open windows & without grinding | 1 |
| to Winix & without grinding & closed windows | 1 |
| Winix & without grinding & closed windows | to Grinding with RWV & open windows | 0 |
| to Grinding with RWV & closed windows | 0 |
| to Grinding without RWV & with closed windows | 0 |
| to Background measurement & without grinding & closed windows | 0.941 |
| to Rohnson & Winix & VacStation & open windows & without grinding | 0.988 |
| to Rohnson & without grinding & closed windows | 1 |
| to Rohnson & Winix & open windows & without grinding | 0.999 |
| to VacStation & without grinding & closed windows | 1 |

***Table S2. Statistical results of a Tukey comparison of PM2.5 means under different conditions (with*** ***and without the simultaneous use of air purifier systems, with open and closed windows during dental procedures. (RWV = Rohnson + Winix + VacStation.)***

| **A comparison of means of PM2.5 for each procedure** | | **Turkey Significance (Significance level was set at P <0.05 for all analyses)** |
| --- | --- | --- |
| Grinding with RWV* & open windows | to Grinding with RWV & closed windows | 0.012 |
| to Grinding without RWV & with closed windows | 0 |
| to Background measurement & without grinding & closed windows | 0.88 |
| to Rohnson & Winix & VacStation & open windows & without grinding | 0.343 |
| to Rohnson & without grinding & with closed windows | 0.003 |
| to without grinding with Rohnson & Winix & open windows | 0.043 |
| to VacStation & without grinding & closed windows | 0.001 |
| to Winix & without grinding & closed windows | 0 |
| Grinding with RWV & closed windows | to Grinding with RWV & open windows | 0.012 |
| to Grinding without RWV & with closed windows | 0 |
| to Background measurement & without grinding & closed windows | 0.008 |
| to Rohnson & Winix & VacStation & open windows | 0 |
| to Rohnson & without grinding & closed windows | 0 |
| to Rohnson & Winix & open windows & without grinding | 0 |
| to VacStation& without grinding & closed windows | 0 |
| to Winix & without grinding & closed windows | 0 |
| Grinding without RWV & with closed windows | to Grinding with RWV & open windows | 0 |
| to Grinding with RWV & closed windows | 0 |
| to Background measurement & without grinding & closed windows | 0 |
| to Rohnson & Winix & VacStation & open windows & without grinding | 0 |
| to Rohnson & without grinding & closed windows | 0 |
| to Rohnson & Winix & open windows & without grinding | 0 |
| to VacStation & without grinding & closed windows | 0 |
| to Winix & without grinding & closed windows | 0 |
| Background measurement without grinding & closed windows | to Grinding with RWV & open windows | 0.88 |
| to Grinding with RWV & closed windows | 0.008 |
| to Grinding without RWV & with closed windows | 0 |
| to Rohnson & Winix & VacStation & open windows | 0.999 |
| to Rohnson & without grinding & closed windows | 0.554 |
| to Rohnson & Winix & open windows | 0.906 |
| to VacStation & without grinding & closed windows | 0.385 |
| to Winix & without grinding & closed windows | 0.263 |
| Rohnson & Winix & VacStation & open windows & without grinding | to Grinding with RWV & open windows | 0.343 |
| to Grinding with RWV & closed windows | 0 |
| to Grinding without RWV & with closed windows | 0 |
| to Background measurement & without grinding & closed windows | 0.999 |
| to Rohnson & without grinding & closed windows | 0.931 |
| to Rohnson & Winix & open windows & without grinding | 0.999 |
| to VacStation & without grinding & closed windows | 0.831 |
| to Winix & without grinding & closed windows | 0.709 |
| Rohnson & without grinding & closed windows | to Grinding with RWV & open windows | 0.003 |
| to Grinding with RWV & closed windows | 0 |
| to Grinding without RWV & with closed windows | 0 |
| to Background measurement & without grinding & closed windows | 0.554 |
| to Rohnson & Winix & VacStation & open windows | 0.931 |
| to Rohnson & Winix & open windows & without grinding | 1 |
| to VacStation & without grinding & closed windows | 1 |
| to Winix & without grinding & closed windows | 1 |
| Rohnson & Winix & open windows & without grinding | to Grinding with RWV & open windows | 0.043 |
| to Grinding with RWV & closed windows | 0 |
| to Grinding without RWV & with closed windows | 0 |
| to Background measurement & without grinding & closed windows | 0.906 |
| to Rohnson & Winix & VacStation & open windows & without grinding | 0.999 |
| to Rohnson & without grinding & closed windows | 1 |
| to VacStation & without grinding & closed windows | 0.995 |
| to Winix & without grinding & closed windows | 0.979 |
| VacStation & without grinding & closed windows | to Grinding with RWV & open windows | 0.001 |
| to Grinding with RWV & closed windows | 0 |
| to Grinding without RWV & with closed windows | 0 |
| to Background measurement & without grinding & closed windows | 0.385 |
| to Rohnson & Winix & VacStation & open windows & without grinding | 0.831 |
| to Rohnson & without grinding & closed windows | 1 |
| to Rohnson & Winix & open windows & without grinding | 0.995 |
| to Winix & without grinding & closed windows | 1 |
| Winix & without grinding & closed windows | to Grinding with RWV & open windows | 0 |
| to Grinding with RWV & closed windows | 0 |
| to Grinding without RWV & with closed windows | 0 |
| to Background measurement & without grinding & closed windows | 0.263 |
| to Rohnson & Winix & VacStation & open windows & without grinding | 0.709 |
| to Rohnson & without grinding & closed windows | 1 |
| to Rohnson & Winix & open windows & without grinding | 0.979 |
| to VacStation & without grinding & closed windows | 1 |

***Table S3. Statistical results of a Tukey comparison of PM1 means under different conditions (with*** ***and without the simultaneous use of air purifier systems, with open and closed windows during dental procedures. (RWV = Rohnson + Winix + VacStation.)***

| **Comparison of means of PM1 for each procedure** | | **Turkey Significance (Significance level was set at P <0.05 for all analyses)** |
| --- | --- | --- |
| Grinding with RWV* & open windows | to Grinding with RWV & closed windows | 0.015 |
| to Grinding without RWV & with closed windows | 0 |
| to Background measurement & without grinding & closed windows | 0.826 |
| to Rohnson & Winix & VacStation & open windows & without grinding | 0.987 |
| to Rohnson & without grinding & with closed windows | 0 |
| to without grinding with Rohnson & Winix & open windows | 0.067 |
| to VacStation & without grinding & closed windows | 0 |
| to Winix & without grinding & closed windows | 0 |
| Grinding with RWV & closed windows | to Grinding with RWV & open windows | 0.015 |
| to Grinding without RWV & with closed windows | 0 |
| to Background measurement & without grinding & closed windows | 0.006 |
| to Rohnson & Winix & VacStation & open windows | 0.977 |
| to Rohnson & without grinding & closed windows | 0.022 |
| to Rohnson & Winix & open windows & without grinding | 0.979 |
| to VacStation& without grinding & closed windows | 0.005 |
| to Winix & without grinding & closed windows | 0 |
| Grinding without RWV & with closed windows | to Grinding with RWV & open windows | 0 |
| to Grinding with RWV & closed windows | 0 |
| to Background measurement & without grinding & closed windows | 0 |
| to Rohnson & Winix & VacStation & open windows & without grinding | 0 |
| to Rohnson & without grinding & closed windows | 0 |
| to Rohnson & Winix & open windows & without grinding | 0 |
| to VacStation & without grinding & closed windows | 0 |
| to Winix & without grinding & closed windows | 0 |
| Background measurement without grinding & closed windows | to Grinding with RWV & open windows | 0.826 |
| to Grinding with RWV & closed windows | 0.006 |
| to Grinding without RWV & with closed windows | 0 |
| to Rohnson & Winix & VacStation & open windows | 0.522 |
| to Rohnson & without grinding & closed windows | 0 |
| to Rohnson & Winix & open windows | 0.009 |
| to VacStation & without grinding & closed windows | 0 |
| to Winix & without grinding & closed windows | 0 |
| Rohnson & Winix & VacStation & open windows & without grinding | to Grinding with RWV & open windows | 0.987 |
| to Grinding with RWV & closed windows | 0.977 |
| to Grinding without RWV & with closed windows | 0 |
| to Background measurement & without grinding & closed windows | 0.522 |
| to Rohnson & without grinding & closed windows | 0.022 |
| to Rohnson & Winix & open windows & without grinding | 0.794 |
| to VacStation & without grinding & closed windows | 0.007 |
| to Winix & without grinding & closed windows | 0.001 |
| Rohnson & without grinding & closed windows | to Grinding with RWV & open windows | 0 |
| to Grinding with RWV & closed windows | 0.022 |
| to Grinding without RWV & with closed windows | 0 |
| to Background measurement & without grinding & closed windows | 0 |
| to Rohnson & Winix & VacStation & open windows | 0.022 |
| to Rohnson & Winix & open windows & without grinding | 0.705 |
| to VacStation & without grinding & closed windows | 1 |
| to Winix & without grinding & closed windows | 0.996 |
| Rohnson & Winix & open windows & without grinding | to Grinding with RWV & open windows | 0.067 |
| to Grinding with RWV & closed windows | 0.979 |
| to Grinding without RWV & with closed windows | 0 |
| to Background measurement & without grinding & closed windows | 0.009 |
| to Rohnson & Winix & VacStation & open windows & without grinding | 0.794 |
| to Rohnson & without grinding & closed windows | 0.705 |
| to VacStation & without grinding & closed windows | 0.483 |
| to Winix & without grinding & closed windows | 0.192 |
| VacStation & without grinding & closed windows | to Grinding with RWV & open windows | 0 |
| to Grinding with RWV & closed windows | 0.005 |
| to Grinding without RWV & with closed windows | 0 |
| to Background measurement & without grinding & closed windows | 0 |
| to Rohnson & Winix & VacStation & open windows & without grinding | 0.007 |
| to Rohnson & without grinding & closed windows | 1 |
| to Rohnson & Winix & open windows & without grinding | 0.483 |
| to Winix & without grinding & closed windows | 1 |
| Winix & without grinding & closed windows | to Grinding with RWV & open windows | 0 |
| to Grinding with RWV & closed windows | 0 |
| to Grinding without RWV & with closed windows | 0 |
| to Background measurement & without grinding & closed windows | 0 |
| to Rohnson & Winix & VacStation & open windows & without grinding | 0.001 |
| to Rohnson & without grinding & closed windows | 0.996 |
| to Rohnson & Winix & open windows & without grinding | 0.192 |
| to VacStation & without grinding & closed windows | 1 |

**Table S4. Results of the Tukey (p<0.005) comparison for various procedures when grinding natural teeth using low-speed instruments**

| **Procedure** | **Turkey Significance (Significance level was set at P <0.05 for all analyses)** |
| --- | --- |
| PM1: Grinding with Winix, without VacStation, with closed windows to Grinding with VacStation & Winix, with closed windows | 0.125 |
| PM2.5: Grinding with Winix, without VacStation, with closed windows to Grinding with VacStation & Winix, with closed windows | 0.009 |
| PM10: Grinding with Winix, without VacStation, with closed windows to Grinding with VacStation & Winix, with closed windows | 0.000 |

**Table S5. Statistical results of a Tukey comparison of** **PM10 means for using a central ventilation system alone and using it in combination with various air purifiers**

| **A comparison of means of PM10 for each procedure** | | **Turkey Significance (Significance level was set at P <0.05 for all analyses)** |
| --- | --- | --- |
|
|  |
| Ventilation & Winix | to Ventilation & Airocide | 0.775 |
| to Ventilation & Winix & Rohnson | 0.270 |
| to Ventilation & Winix & Rohnson & Airocide | 0.168 |
| to Ventilation system | 0.621 |
| Ventilation & Airocide | to Ventilation & Winix | 0.775 |
| to Ventilation & Winix & Rohnson | 0.017 |
| to Ventilation & Winix & Rohnson & Airocide | 0.008 |
| toVentilation system | 0.999 |
| Ventilation & Winix & Rohnson | to Ventilation & Winix | 0.270 |
| to Ventilation & Airocide | 0.017 |
| to Ventilation & Winix & Rohnson & Airocide | 0.999 |
| to Ventilation system | 0.008 |
| Ventilation & Winix & Rohnson & Airocide | to Ventilation & Winix | 0.168 |
| to Ventilation & Airocide | 0.008 |
| to Ventilation & Winix & Rohnson | 0.999 |
| to Ventilation system | 0.003 |
| Ventilation system | to Ventilation & Winix | 0.621 |
| to Ventilation & Airocide | 0.999 |
| to Ventilation & Winix & Rohnson | 0.008 |
| to Ventilation & Winix & Rohnson & Airocide | 0.003 |

**Table S6. Statistical results of a Tukey comparison of PM2.5 means for using a central ventilation system alone and using it in combination with various air purifiers**

| **A comparison of means of PM2.5 for each procedure** | | **Turkey Significance (Significance level was set at P <0.05 for all analyses)** |
| --- | --- | --- |
|
|  |
| Ventilation & Winix | to Ventilation & Airocide | 0.000 |
| to Ventilation & Winix & Rohnson | 0.102 |
| to Ventilation & Winix & Rohnson & Airocide | 0.069 |
| to Ventilation system | 0.881 |
| Ventilation & Airocide | to Ventilation & Winix | 0.000 |
| to Ventilation & Winix & Rohnson | 0.000 |
| to Ventilation & Winix & Rohnson & Airocide | 0.000 |
| toVentilation system | 0.000 |
| Ventilation & Winix & Rohnson | to Ventilation & Winix | 0.102 |
| to Ventilation & Airocide | 0.000 |
| to Ventilation & Winix & Rohnson & Airocide | 1.000 |
| to Ventilation system | 0.537 |
| Ventilation & Winix & Rohnson & Airocide | to Ventilation & Winix | 0.069 |
| to Ventilation & Airocide | 0.000 |
| to Ventilation & Winix & Rohnson | 1.000 |
| to Ventilation system | 0.435 |
| Ventilation system | to Ventilation & Winix | 0.881 |
| to Ventilation & Airocide | 0.000 |
| to Ventilation & Winix & Rohnson | 0.537 |
| to Ventilation & Winix & Rohnson & Airocide | 0.435 |

**Table S7. Statistical results of a Tukey comparison of PM1 means for using a central ventilation system alone and using it in combination with various air purifiers**

| **A comparison of means of PM1 for each procedure** | | **Turkey Significance (Significance level was set at P <0.05 for all analyses)** |
| --- | --- | --- |
|
| Ventilation & Winix | to Ventilation & Airocide | 0.000 |
| to Ventilation & Winix & Rohnson | 0.289 |
| to Ventilation & Winix & Rohnson & Airocide | 0.664 |
| to Ventilation system | 0.198 |
| Ventilation & Airocide | to Ventilation & Winix | 0.000 |
| to Ventilation & Winix & Rohnson | 0.000 |
| to Ventilation & Winix & Rohnson & Airocide | 0.000 |
| To Ventilation system | 0.000 |
| Ventilation & Winix & Rohnson | to Ventilation & Winix | 0.289 |
| to Ventilation & Airocide | 0.000 |
| to Ventilation & Winix & Rohnson & Airocide | 0.971 |
| to Ventilation system | 1.000 |
| Ventilation & Winix & Rohnson & Airocide | to Ventilation & Winix | 0.664 |
| to Ventilation & Airocide | 0.000 |
| to Ventilation & Winix & Rohnson | 0.971 |
| to Ventilation system | 0.922 |
| Ventilation system | to Ventilation & Winix | 0.198 |
| to Ventilation & Airocide | 0.000 |
| to Ventilation & Winix & Rohnson | 1.000 |
| to Ventilation & Winix & Rohnson & Airocide | 0.922 |
